# Supplementary material for: Current and Future Patterns of Global Marine Mammal Biodiversity
Source: PubMed Central journal article supplement (PMC3100303; doi:10.1371/journal.pone.0019653), 2011-05-23

Figure S1.

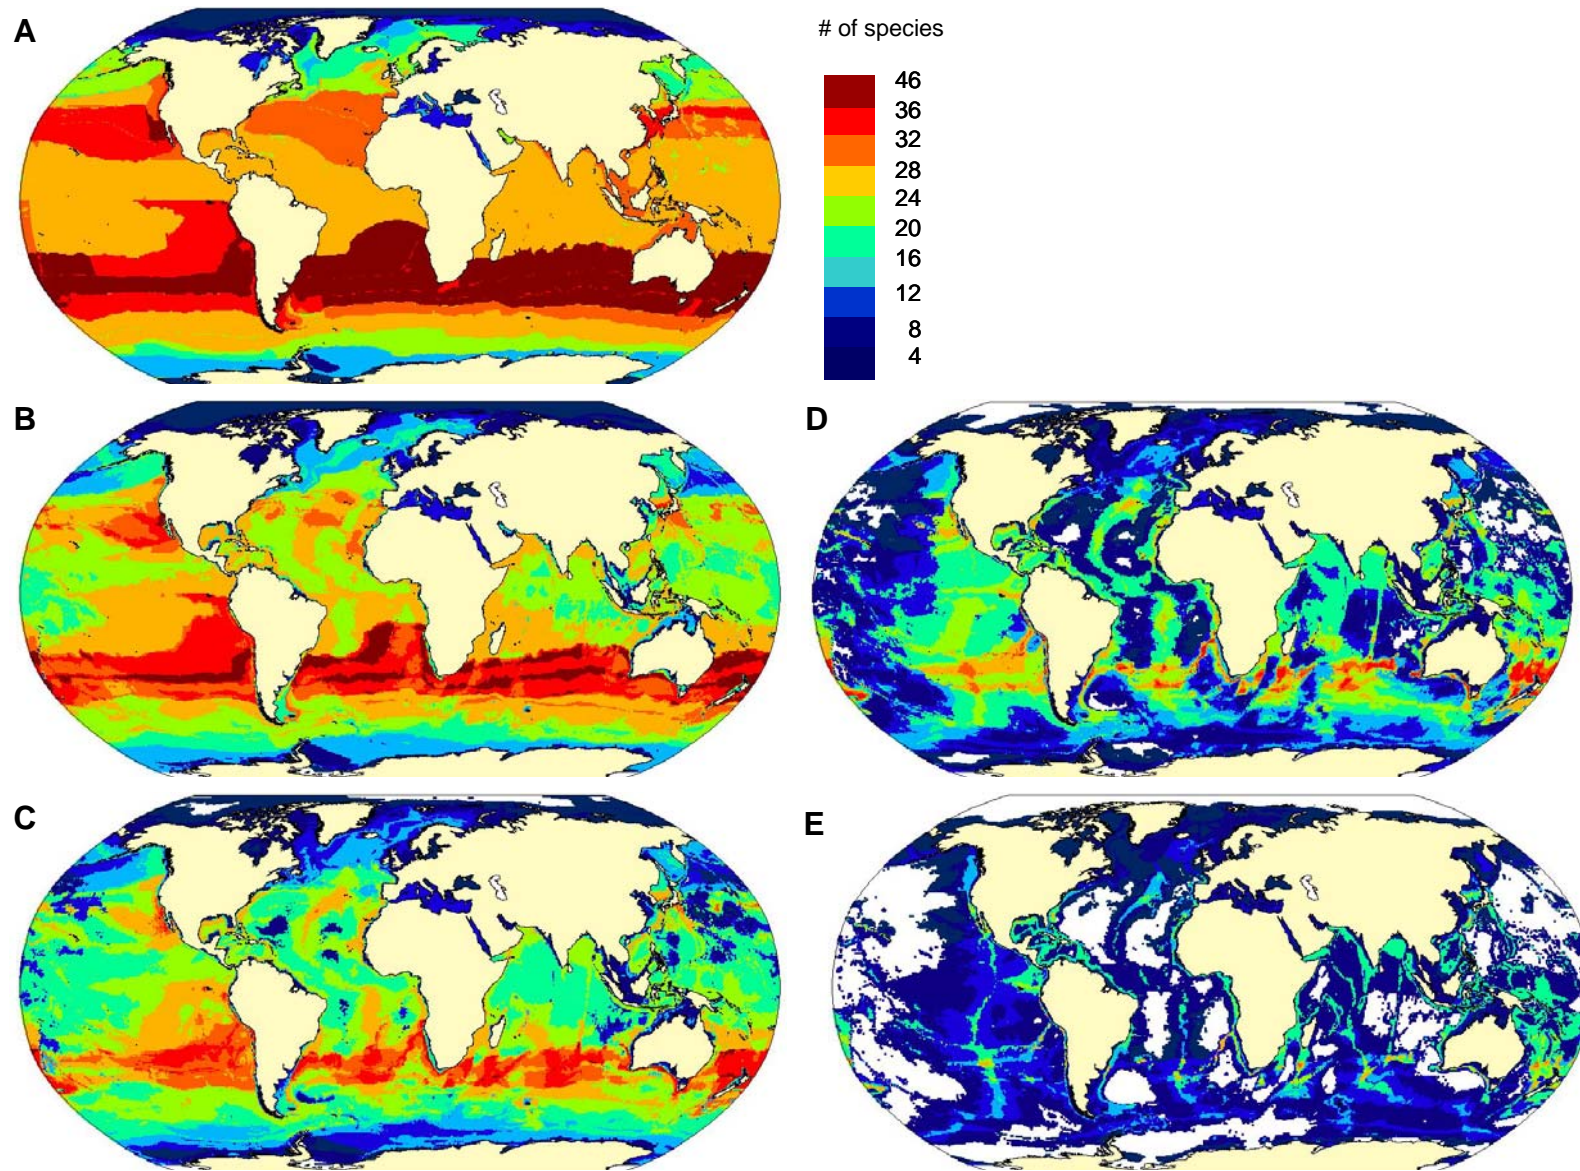

Supplement: pone.0019653.s001.pdf [file pone.0019653.s001.pdf]
