# Supplementary material for: Current and Future Patterns of Global Marine Mammal Biodiversity
Source: PubMed Central journal article supplement (PMC3100303; doi:10.1371/journal.pone.0019653), 2011-05-23
Supplement: pone.0019653.s002.pdf [file pone.0019653.s002.pdf]

Table S1

|                  |                    | <b>AIC</b>                                          |             |             |             |             |             |             |             |             |             |             |             |             |             |             |        |
|------------------|--------------------|-----------------------------------------------------|-------------|-------------|-------------|-------------|-------------|-------------|-------------|-------------|-------------|-------------|-------------|-------------|-------------|-------------|--------|
|                  |                    | <b>RES threshold for predicted species presence</b> |             |             |             |             |             |             |             |             |             |             |             |             |             |             |        |
|                  |                    | <b>0.00</b>                                         | <b>0.20</b> | <b>0.25</b> | <b>0.30</b> | <b>0.35</b> | <b>0.40</b> | <b>0.45</b> | <b>0.50</b> | <b>0.55</b> | <b>0.60</b> | <b>0.65</b> | <b>0.70</b> | <b>0.75</b> | <b>0.80</b> | <b>1.00</b> |        |
| <b>SWFSC-ETP</b> | <b>All surveys</b> | <b>20</b>                                           | 743.17      | 747.23      | 751.35      | 738.47      | 743.09      | 748.42      | 746.56      | 747.63      | 736.46      | 735.96      | 746.32      | 753.80      | 758.94      | 756.48      | 764.29 |
|                  |                    | <b>50</b>                                           | 606.95      | 600.60      | 608.03      | 607.85      | 605.27      | 592.15      | 588.48      | 588.44      | 590.00      | 582.62      | 584.14      | 581.45      | 594.22      | 595.51      | 609.60 |
|                  |                    | <b>100</b>                                          | 353.24      | 325.07      | 314.99      | 318.80      | 318.00      | 318.91      | 318.25      | 323.09      | 322.48      | 324.51      | 345.50      | 348.87      | 351.89      | 340.30      | 382.07 |
|                  | <b>IWC-IDCR</b>    | <b>20</b>                                           | 416.74      | 405.41      | 410.32      | 404.49      | 412.22      | 412.42      | 411.24      | 415.98      | 409.45      | 413.23      | 413.60      | 418.80      | 410.85      | 419.20      | 430.77 |
|                  |                    | <b>50</b>                                           | 278.96      | 276.46      | 274.39      | 277.91      | 273.30      | 280.24      | 277.63      | 275.31      | 266.35      | 275.53      | 264.99      | 275.33      | 269.03      | 281.49      | 287.41 |
|                  |                    | <b>100</b>                                          | 218.64      | 206.16      | 201.99      | 203.25      | 201.07      | 199.84      | 202.97      | 208.34      | 209.26      | 211.12      | 215.75      | 216.93      | 214.24      | 218.42      | 208.23 |
|                  | <b>NASS</b>        | <b>20</b>                                           | 88.77       | 89.09       | 89.02       | 95.56       | 85.56       | 91.08       | 88.40       | 85.99       | 86.36       | 87.26       | 85.28       | 86.24       | 78.15       | 80.34       | 79.57  |
|                  |                    | <b>50</b>                                           | 90.06       | 89.12       | 88.73       | 88.59       | 90.68       | 92.26       | 90.06       | 86.35       | 88.41       | 89.76       | 88.23       | 89.63       | 83.31       | 84.08       | 85.57  |
|                  |                    | <b>100</b>                                          | 60.89       | 46.20       | 46.69       | 49.82       | 48.25       | 48.06       | 48.41       | 42.13       | 44.06       | 53.18       | 52.22       | 44.31       | 45.11       | 51.62       | 54.24  |
| <b>ETP</b>       | <b>20</b>          | 210.72                                              | 209.60      | 209.36      | 210.93      | 210.97      | 210.82      | 210.91      | 210.97      | 210.97      | 210.60      | 210.95      | 210.31      | 216.99      | 210.80      | 210.68      |        |
|                  | <b>50</b>          | 161.07                                              | 162.16      | 162.36      | 159.86      | 159.48      | 160.03      | 160.15      | 159.65      | 160.12      | 160.42      | 161.98      | 163.22      | 163.60      | 164.30      | 165.60      |        |
|                  | <b>100</b>         | 60.94                                               | 57.45       | 56.77       | 53.16       | 56.26       | 53.96       | 58.23       | 57.45       | 53.00       | 48.68       | 53.46       | 52.17       | 55.30       | 51.75       | 60.15       |        |
|                  |                    | <b>adjusted R<sup>2</sup></b>                       |             |             |             |             |             |             |             |             |             |             |             |             |             |             |        |
|                  |                    | <b>RES threshold for predicted species presence</b> |             |             |             |             |             |             |             |             |             |             |             |             |             |             |        |
|                  |                    | <b>0.00</b>                                         | <b>0.20</b> | <b>0.25</b> | <b>0.30</b> | <b>0.35</b> | <b>0.40</b> | <b>0.45</b> | <b>0.50</b> | <b>0.55</b> | <b>0.60</b> | <b>0.65</b> | <b>0.70</b> | <b>0.75</b> | <b>0.80</b> | <b>1.00</b> |        |
| <b>SWFSC-ETP</b> | <b>All surveys</b> | <b>20</b>                                           | 0.79        | 0.78        | 0.78        | 0.79        | 0.79        | 0.78        | 0.80        | 0.79        | 0.79        | 0.79        | 0.79        | 0.78        | 0.78        | 0.78        | 0.77   |
|                  |                    | <b>50</b>                                           | 0.80        | 0.81        | 0.80        | 0.80        | 0.80        | 0.82        | 0.82        | 0.82        | 0.82        | 0.83        | 0.83        | 0.83        | 0.83        | 0.82        | 0.81   |
|                  |                    | <b>100</b>                                          | 0.85        | 0.88        | 0.90        | 0.89        | 0.89        | 0.89        | 0.89        | 0.89        | 0.89        | 0.88        | 0.86        | 0.85        | 0.85        | 0.87        | 0.80   |
|                  | <b>IWC-IDCR</b>    | <b>20</b>                                           | 0.38        | 0.43        | 0.42        | 0.44        | 0.40        | 0.40        | 0.40        | 0.38        | 0.41        | 0.39        | 0.39        | 0.37        | 0.41        | 0.37        | 0.33   |
|                  |                    | <b>50</b>                                           | 0.62        | 0.63        | 0.64        | 0.62        | 0.64        | 0.61        | 0.62        | 0.63        | 0.66        | 0.63        | 0.67        | 0.62        | 0.65        | 0.59        | 0.58   |
|                  |                    | <b>100</b>                                          | 0.38        | 0.48        | 0.51        | 0.50        | 0.52        | 0.52        | 0.49        | 0.46        | 0.43        | 0.42        | 0.37        | 0.36        | 0.39        | 0.37        | 0.49   |
|                  | <b>NASS</b>        | <b>20</b>                                           | 0.44        | 0.43        | 0.43        | 0.24        | 0.50        | 0.35        | 0.41        | 0.45        | 0.45        | 0.43        | 0.47        | 0.45        | 0.58        | 0.55        | 0.56   |
|                  |                    | <b>50</b>                                           | 0.51        | 0.53        | 0.54        | 0.54        | 0.50        | 0.41        | 0.46        | 0.54        | 0.50        | 0.47        | 0.51        | 0.47        | 0.60        | 0.59        | 0.56   |
|                  |                    | <b>100</b>                                          | 0.38        | 0.81        | 0.80        | 0.72        | 0.75        | 0.75        | 0.74        | 0.84        | 0.81        | 0.64        | 0.66        | 0.83        | 0.83        | 0.72        | 0.66   |
| <b>ETP</b>       | <b>20</b>          | 0.14                                                | 0.16        | 0.16        | 0.14        | 0.14        | 0.14        | 0.14        | 0.14        | 0.14        | 0.15        | 0.14        | 0.15        | 0.03        | 0.14        | 0.15        |        |
|                  | <b>50</b>          | 0.11                                                | 0.08        | 0.08        | 0.13        | 0.14        | 0.13        | 0.13        | 0.14        | 0.13        | 0.12        | 0.09        | 0.06        | 0.05        | 0.03        | 0.00        |        |
|                  | <b>100</b>         | 0.49                                                | 0.59        | 0.61        | 0.73        | 0.62        | 0.72        | 0.62        | 0.64        | 0.74        | 0.80        | 0.69        | 0.75        | 0.65        | 0.76        | 0.57        |        |
